# Supplementary material
Source: publisher site journal article supplement (https://www.dovepress.com/get_supplementary_file.php?f=489731.docx)
Supplement: Supplementary file 1 [file get_supplementary_file.php]

Supplementary Table 1. COREQ (Consolidated criteria for reporting qualitative Research) checklist

| Domain | Items | HCP focus group | Patients’ focus groups |
| --- | --- | --- | --- |
| Domain 1: Research team and reflexivity | | | |
| Personal characteristics | | | |
| 1. Interviewer/facilitator | Which author/s conducted the interview or focus group? | M.C. and M.H. as Outcomes'10 staff (CRO of the study) | HD.P. and E.V. as Outcomes'10 staff (CRO of the study) |
| 2. Credentials | What were the researcher’s credentials? E.g., Ph.D., MD | M.C. is a PhD pharmacist, and M.H. is a PhD in biomedicine | HD.P. and E.V. are PhD biologists |
| 3. Occupation | What was their occupation at the time of the study? | M.C. and M.H. was working on Outcomes'10. CRO coordinating the study. | HD.P. and E.V. were working on Outcomes'10. |
| 4. Gender | Was the researcher male or female? | Female and male, respectively | Male and female, respectively |
| 5. Experience and training | What experience or training did the researcher have? | Both researchers have participated, designed and conducted the FG | Both researchers have participated, designed and conducted the FG |
| Relationship with participants | | | |
| 6. Relationship established | Was a relationship established before study commencement? | No previous contact | No previous contact |
| 7. Participant knowledge of the interviewer | What did the participants know about the researcher? e.g., personal goals, reasons for doing the research | The interviewer was introduced at the beginning of the meeting and participants were informed of the purpose of the study (orally + signature of informed consent) at the beginning of the FG session. | The interviewers were introduced at the beginning of the meeting and participants were informed of the purpose of the study (orally + signature of informed consent) at the beginning of the FG session. |
| 8. Interviewer characteristics | What characteristics were reported about the interviewer/facilitator? e.g., Bias, assumptions, reasons, and interests in the research topic | Interviewer's previous experience of using and conducting meetings and FG, and the potential bias this may introduce. | Interviewers' previous experience of using and conducting meetings and FG, and the potential bias this may introduce. |
| Domain 2: study design | | | |
| Theoretical framework | | | |
| 9. Methodological orientation and theory | What methodological orientation was stated to underpin the study? e.g., grounded theory, discourse analysis, ethnography, phenomenology, content analysis | Phenomenology | Phenomenology |
| Participant selection | | | |
| 10. Sampling | How were participants selected? e.g., purposive, convenience, consecutive, snowball | Their professional experience in the field of AD or Pso was taken into consideration | Their experience in the field of AD or Pso was taken into account, while an attempt was made to ensure a heterogeneous group (gender, age, etc.). |
| 11. Method of approach | How were participants approached? e.g., face-to-face, telephone, mail, email | On-line | Face-to-face |
| 12. Sample size | How many participants were in the study? | 6 | AD, n= 4. Pso, n= 7 |
| 13. Non-participation | How many people refused to participate or dropped out? Reasons? | None | A total of 11 individuals were invited to participate in each FG Of them, 7 AD and 4 Pso patients did take part in the FG due to incompatibility with the schedule |
| Setting | | | |
| 14. Setting of data collection | Where was the data collected? e.g., home, clinic, workplace | Workplace | Hospital |
| 15. Presence of non-participants | Was anyone else present besides the participants and researchers? | No | No |
| 16. Description of sample | What are the important characteristics of the sample? e.g., demographic data, date | The sample consisted of three dermatologists and three hospital pharmacists | A heterogeneous group of patients who were being followed up at the center. |
| 17. Interview guide | Were questions, prompts, guides provided by the authors? Was it pilot-tested? | The meeting focused on a pre-work activity that facilitated discussion and consensus building on the patient care process. This allowed participants to identify unmet needs and opportunities for improvement in a clear and concise manner, while maintaining an objective and balanced tone. | At the meeting, various techniques were developed to facilitate communication among participants, including visual thinking, and metaplan. Additionally, moderators asked questions to help patients express their experiences with the care process. |
| 18. Repeat interviews | Were repeat interviews carried out? If yes, how many? | No | No |
| 19. Audio/visual recorging | Did the research use audio or visual recordings to collect the data? | Yes (visual recording) | Yes (audio) |
| 20. Field notes | Were field notes made during and/or after the interview or focus group? | Yes | Yes |
| 21. Duration | What was the duration of the interviews or focus group? | Approximately 2 hours | Approximately 2 hours |
| 22. Data saturation | Was data saturation discussed? | No | No |
| 23. Transcipts returned | Were transcripts returned to participants for comment and/or correction? | No | No |
| Domain 3: analysis and findings | | | |
| Data analysis | | | |
| 24. Number of data coders | How many data coders coded the data? | NA | NA |
| 25. Description of the coding tree | Did the authors describe the coding tree? | NA | NA |
| 26. Derivation of themes | Were themes identified in advance or derived from the data? | Themes were identified in advance but derived from the responses as they emerged. | Themes were identified in advance but derived from the responses as they emerged. |
| 27. Software | What software, if applicable, was used to manage the data? | Not used, not necessary | Not used, not necessary |
| 28. Participant checking | Did participants provide feedback on the findings? | Yes | No |
| Reporting | | | |
| 29. Quotations presented | Were participant quotations presented to illustrate the themes/ findings? Was each quotation identified? e.g., participant number | No | Yes, but they did not identify with any specific patient. |
| 30. Data and findings consistent | Was there consistency between the data presented and the findings? | Yes | NA |
| 31. Clarity of major themes | Were major themes presented in the findings? | Yes | Yes |
| 32. Clarity of minor themes | Is there a description of diverse cases or a discussion of minor themes? | Yes | Yes |

HCP: Healthcare professionals; CRO: Contract research organization; NA: Not applicable; FC: Focus group; AD: Atopic dermatitis; Pso: Psoriasis
